# Supplementary material for: Foxp3+ CD4+ regulatory T cells control dendritic cells in inducing antigen-specific immunity to emerging SARS-CoV-2 antigens
Source: PubMed Central journal article supplement (PMC8659413; doi:10.1371/journal.ppat.1010085), 2021-12-09
Supplement: ppat.1010085.s001.pdf [file ppat.1010085.s001.pdf]

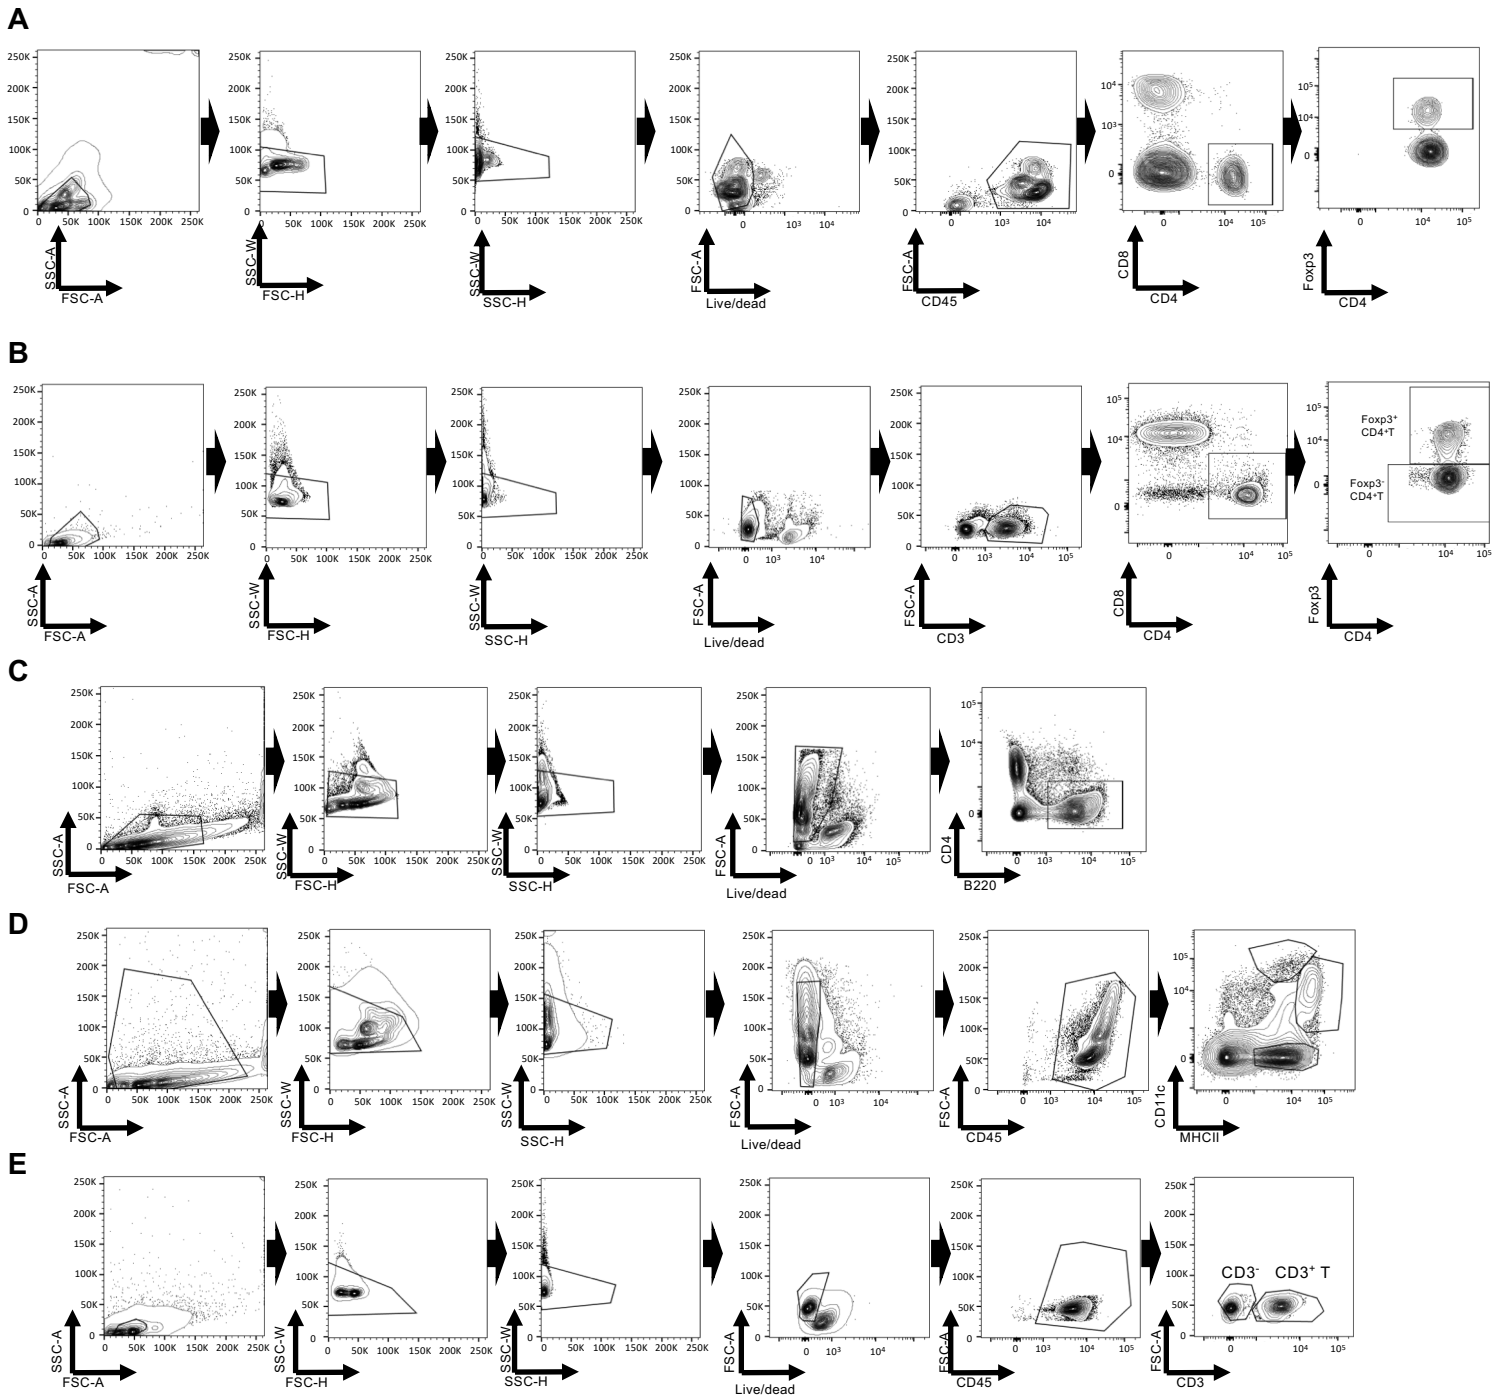

**S1 Fig. Flow cytometry gating strategy**

- (A) Gating strategy for Figs 1B, 6B and S2. Foxp3<sup>+</sup> CD4<sup>+</sup> T cells are pre-gated on size, singlets, dead cell stain<sup>-</sup>, and CD45<sup>+</sup>.
- (B) Gating strategy for Figs 2B, S3A and S10. Foxp3<sup>+</sup> or Foxp3<sup>-</sup> CD4<sup>+</sup> T cells are pre-gated on size, singlets, dead cell stain<sup>-</sup>, CD3<sup>+</sup>, CD4<sup>+</sup>, and separated by Foxp3 expression.
- (C) Gating strategy for Figs 2C and S3B. CD4<sup>-</sup> B220<sup>+</sup> B cells are pre-gated on size, singlets, and dead cell stain<sup>-</sup>.
- (D) Gating strategy for Figs 3B and 3C. MHCII<sup>high</sup> CD11c<sup>int</sup> migratory DCs, MHCII<sup>int</sup> CD11c<sup>high</sup> resident DCs and MHCII<sup>+</sup> CD11c<sup>-</sup> non-DCs are pre-gated on size, singlets, dead cell stain<sup>-</sup>, CD45<sup>+</sup> and separated by MHCII and CD11c expression.
- (E) Gating strategy for Figs 5C, S8 and S9. CD3<sup>+</sup> T or CD3<sup>-</sup> cells pre-gated on size, singlets, dead cell stain<sup>-</sup>, and CD45<sup>+</sup> and separated by CD3 expression.
