# Supplementary material for: Foxp3+ CD4+ regulatory T cells control dendritic cells in inducing antigen-specific immunity to emerging SARS-CoV-2 antigens
Source: PubMed Central journal article supplement (PMC8659413; doi:10.1371/journal.ppat.1010085), 2021-12-09
Supplement: ppat.1010085.s002.pdf [file ppat.1010085.s002.pdf]

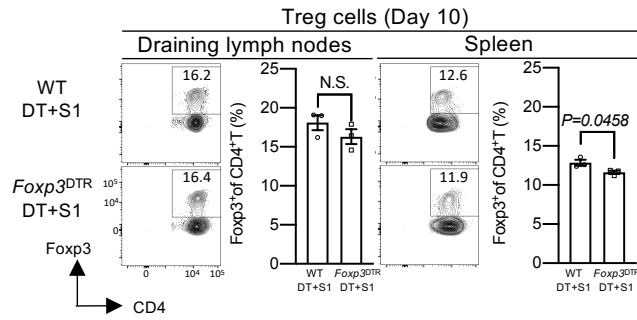

**S2 Fig. Treg cells are recovered in draining lymph nodes and spleen on day 10.**

As in Fig 1B, but WT and *Foxp3*<sup>DTR</sup> mice were injected with DT and S1 on day 0. On day 10, draining lymph nodes (axillary and popliteal) and spleen were analyzed. Representative graphs from two independent experiments (n = 3/group). Data were analyzed using unpaired Student's t-test.
