# Supplementary material for: Foxp3+ CD4+ regulatory T cells control dendritic cells in inducing antigen-specific immunity to emerging SARS-CoV-2 antigens
Source: PubMed Central journal article supplement (PMC8659413; doi:10.1371/journal.ppat.1010085), 2021-12-09
Supplement: ppat.1010085.s004.pdf [file ppat.1010085.s004.pdf]

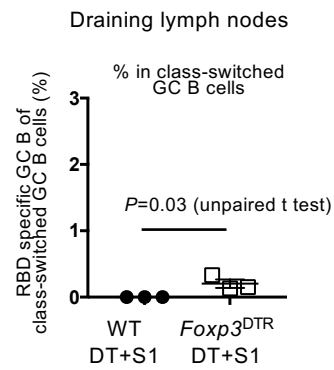

**S4 Fig. Transient Treg-cell depletion induces small numbers of HA binding B cells non-specifically.**

As in Fig 2C, but HA-binding class-switched GC B cells were gated on IgM<sup>-</sup> IgD<sup>-</sup> class-switched GC B cells. HA protein was used as a negative control for RBD-binding. Representative frequencies of HA-binding GC B cells from two independent experiments are plotted as the mean  $\pm$  SEM (n = 3/group). Data were analyzed using unpaired Student's t-test.
