# Supplementary material for: Foxp3+ CD4+ regulatory T cells control dendritic cells in inducing antigen-specific immunity to emerging SARS-CoV-2 antigens
Source: PubMed Central journal article supplement (PMC8659413; doi:10.1371/journal.ppat.1010085), 2021-12-09
Supplement: ppat.1010085.s007.pdf [file ppat.1010085.s007.pdf]

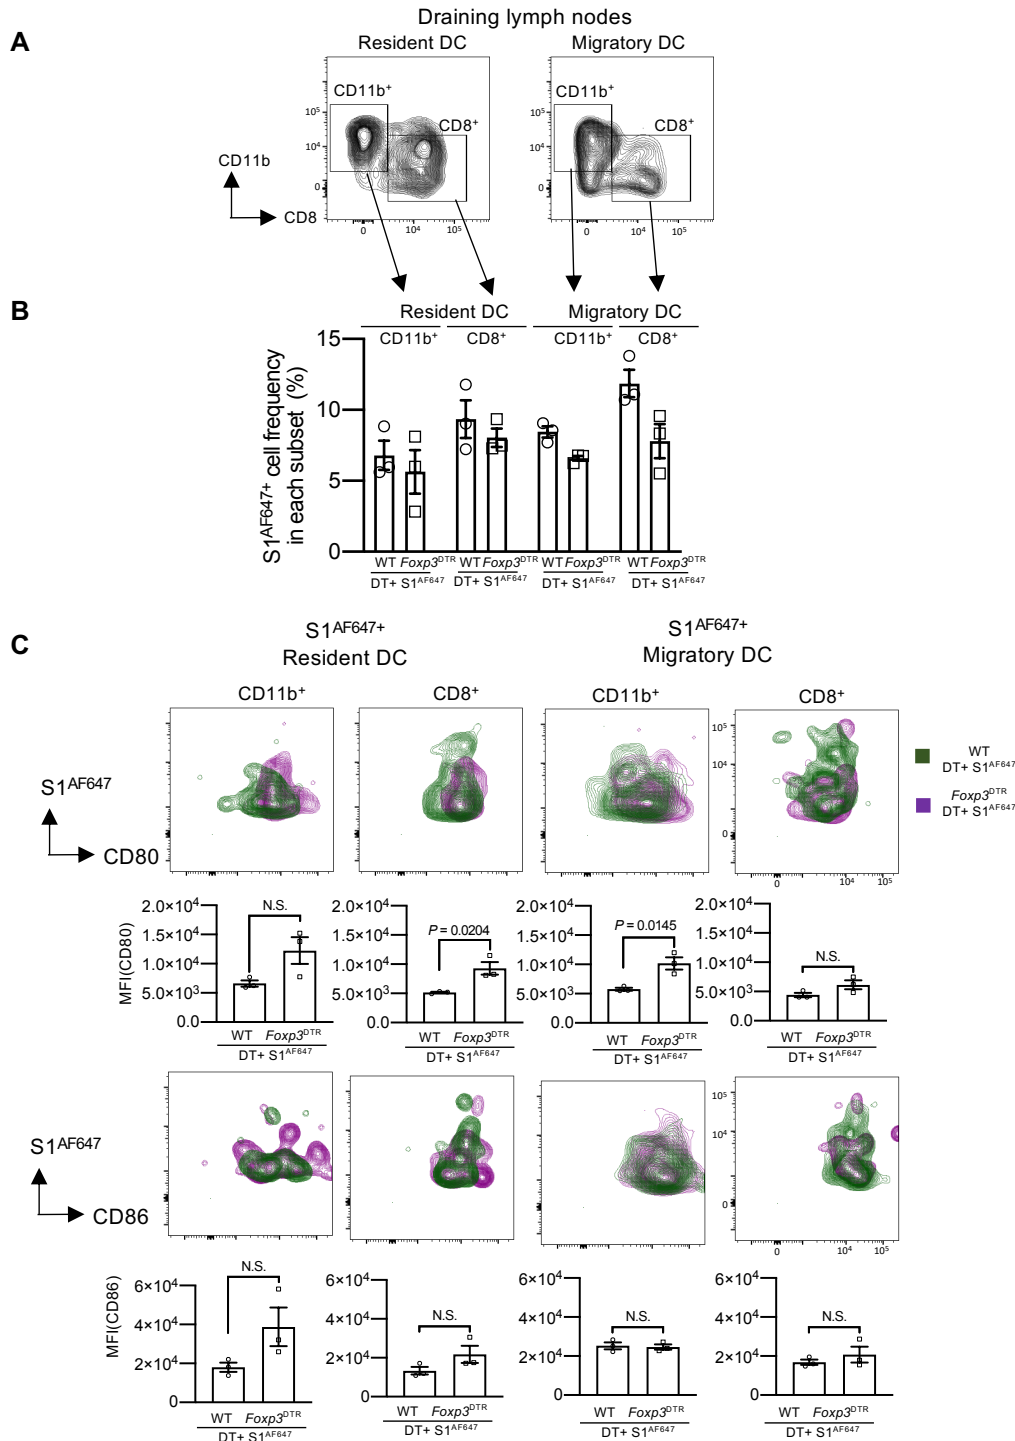

**S7 Fig. S1-captured DC subsets undergo maturation in transient Treg cell-depleted mice.**

(A) Representative FACS plots to identify CD11b<sup>+</sup> and CD8<sup>+</sup> subsets in S1<sup>AF647</sup>-captured migratory or resident DCs as gated in Fig 4D. Representative plots of two independent experiments are shown.

(B) S1<sup>AF647</sup><sup>+</sup> cell frequencies in the CD11b<sup>+</sup> and CD8<sup>+</sup> subsets in migratory or resident DCs in draining lymph nodes on day 2 after DT+S1<sup>AF647</sup>-injection. Representative of two independent experiments. The data are presented as the mean ± SEM (n = 3/group). Data were analyzed using two-way ANOVA with Tukey's multiple comparisons test.

(C) Representative overlaid contour plots of CD80 and CD86 expression gated on CD11b<sup>+</sup> or CD8<sup>+</sup> DC subsets within S1<sup>AF647</sup><sup>+</sup> resident or S1<sup>AF647</sup><sup>+</sup> migratory DC subsets from draining lymph nodes of DT+S1<sup>AF647</sup>-injected mice are shown (WT, green; *Foxp3<sup>DTR</sup>*, red-purple). Representative of two independent experiments for FACS plots and graphics are shown. The graphic data represents as the mean ± SEM of the MFI (n=3/ group). Data were analyzed using an unpaired Student's t-test.
