# Supplementary material for: Foxp3+ CD4+ regulatory T cells control dendritic cells in inducing antigen-specific immunity to emerging SARS-CoV-2 antigens
Source: PubMed Central journal article supplement (PMC8659413; doi:10.1371/journal.ppat.1010085), 2021-12-09
Supplement: ppat.1010085.s008.pdf [file ppat.1010085.s008.pdf]

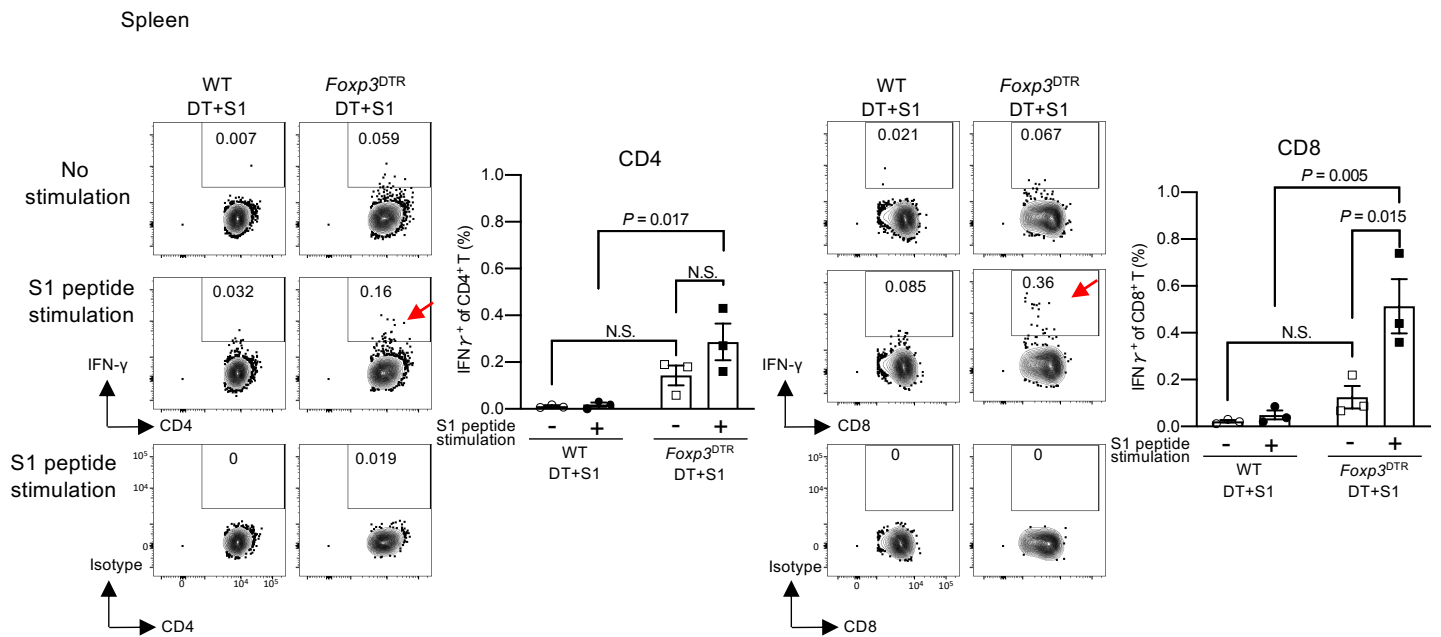

**S8 Fig. SARS-CoV-2 antigen-specific IFN- $\gamma$  producing CD4<sup>+</sup> and CD8<sup>+</sup> T cells are successfully induced in spleens from transient Treg cell-depleted mice.**

As in Fig 5C, but IFN- $\gamma$ -secreting cells from spleens are shown in CD4<sup>+</sup> (left) and CD8<sup>+</sup> T (right) cells. Representative plots from two independent experiments are shown, gated on live CD45<sup>+</sup>, CD3<sup>+</sup> cells (S1E Fig., gating strategy). The frequencies of positive cell populations are represented as the mean  $\pm$  SEM (n = 3/group). Representative from two independent experiments. Data were analyzed using two-way ANOVA with Tukey's multiple comparisons test.
