# Supplementary material for: Foxp3+ CD4+ regulatory T cells control dendritic cells in inducing antigen-specific immunity to emerging SARS-CoV-2 antigens
Source: PubMed Central journal article supplement (PMC8659413; doi:10.1371/journal.ppat.1010085), 2021-12-09
Supplement: ppat.1010085.s009.pdf [file ppat.1010085.s009.pdf]

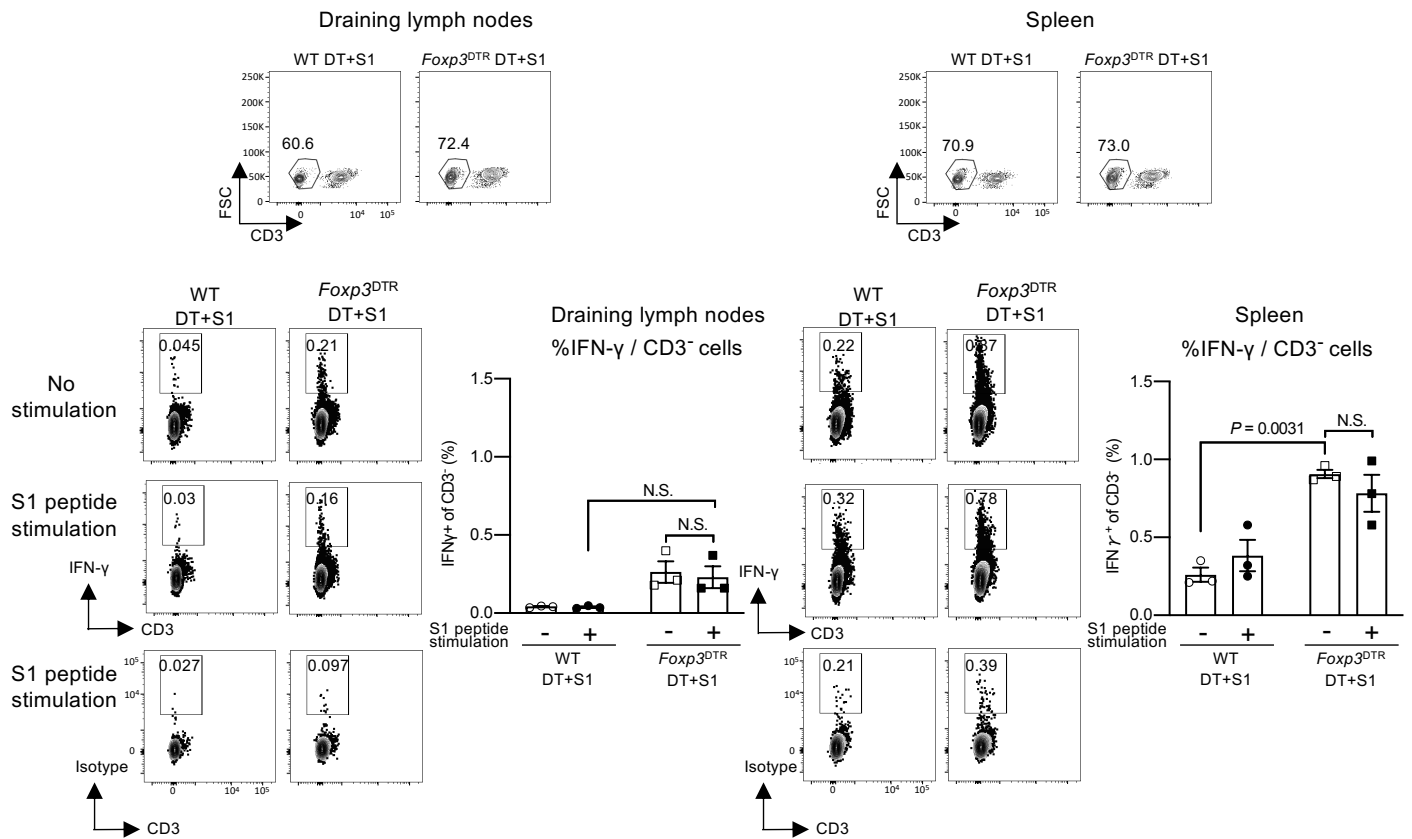

**S9 Fig. IFN- $\gamma$  producing CD3<sup>+</sup> cells are induced in transient Treg cell-depleted mice.**

As in Fig 5C, but cells from draining lymph nodes (left) and spleens (right) are shown for IFN- $\gamma$  expression in CD3<sup>+</sup> cells. Representative plots from two independent experiments that were pre-gated on size, singlets, dead cell stain<sup>-</sup>, CD45<sup>+</sup>, and CD3<sup>+</sup> cells (S1E Fig, gating strategy). Representative of two independent experiments for FACS plots and graphics are shown. The mean frequencies of positive cell populations are represented  $\pm$  SEM (n = 3/group). Data were analyzed using two-way ANOVA with Tukey's multiple comparisons test.
