# Supplementary material for: Foxp3+ CD4+ regulatory T cells control dendritic cells in inducing antigen-specific immunity to emerging SARS-CoV-2 antigens
Source: PubMed Central journal article supplement (PMC8659413; doi:10.1371/journal.ppat.1010085), 2021-12-09
Supplement: ppat.1010085.s010.pdf [file ppat.1010085.s010.pdf]

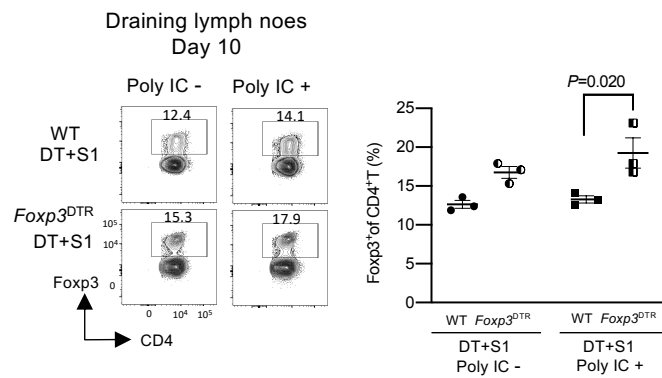

**S10 Fig. Treg cells are recovered in draining lymph nodes on day 10 with poly IC.**

As in Fig 6A, but WT and *Foxp3<sup>DTR</sup>* mice were injected with DT and S1 on day 0 with or without poly IC. On day 10, draining lymph nodes (axillary and popliteal) were analyzed. Representative graphs from a single experiment (n = 3/group), gated on CD3<sup>+</sup> CD4<sup>+</sup> cells (S1B Fig, gating strategy). Data were analyzed using two-way ANOVA with Tukey's multiple comparisons test.
